1 **Asymmetric redundancy of *ZERZAUST* and *ZERZAUST HOMOLOG* in different**  
2 **accessions of *Arabidopsis thaliana***

3

4 Prasad Vaddepalli<sup>1\*</sup>, Lynette Fulton and Kay Schneitz<sup>\*</sup>

5

6 Entwicklungsbiologie der Pflanzen, Wissenschaftszentrum Weihenstephan, Technische  
7 Universität München, Freising, Germany

8

9 <sup>1</sup>Present address: Laboratory of Biochemistry, Wageningen University, Wageningen, the  
10 Netherlands

11

12 \*Corresponding authors

13 PV:

14 Laboratory of Biochemistry

15 Wageningen University

16 Stippeneng 4

17 6708 WE Wageningen, the Netherlands

18 Email: [prasad.vaddepalli@wur.nl](mailto:prasad.vaddepalli@wur.nl)

19 Tel: +31 317 485815

20

21 KS:

22 Entwicklungsbiologie der Pflanzen

23 Wissenschaftszentrum Weihenstephan

24 Technische Universität München

25 Emil-Ramann-Str. 4

26 D-85354 Freising

27 Email: [kay.schneitz@tum.de](mailto:kay.schneitz@tum.de)

28 Tel: +49 8161 715438

29

30 Short title: Genetic analysis of *ZERZAUST HOMOLOG*

31

32 Key words: *Arabidopsis*, accessions, genetic redundancy, asymmetric gene expression,  
33 *ZERZAUST*, *ZERZAUST HOMOLOG*

34

35 **ABSTRACT**

36 Divergence among duplicate genes is one of the important sources of evolutionary  
37 innovation. But, the contribution of duplicate divergence to variation in Arabidopsis  
38 accessions is sparsely known. Recently, we studied the role of a cell wall localized protein,  
39 *ZERZAUST* (*ZET*), in Landsberg *erecta* (*Ler*) accession. Here, we present the study of *ZET*  
40 in Columbia (*Col*) accession, which not only showed differential expression patterns in  
41 comparison to *Ler*, but also revealed its close homolog, *ZERZAUST HOMOLOG* (*ZETH*).  
42 Although, genetic analysis implied redundancy, expression analysis revealed divergence,  
43 with *ZETH* showing minimal expression in both *Col* and *Ler*. In addition, *ZETH* shows  
44 relatively higher expression levels in *Col* compared to *Ler*. Our data also reveal  
45 compensatory up-regulation of *ZETH* in *Col*, but not in *Ler*, implying it is perhaps  
46 dispensable in *Ler*. However, a novel CRISPR/Cas9-induced *zeth* allele confirmed that *ZETH*  
47 has residual activity in *Ler*. The results provide genetic evidence for accession-specific  
48 differences in compensation mechanism and asymmetric gene contribution. Thus, our work  
49 reveals a novel example for how weakly expressed homologs contribute to diversity among  
50 accessions.

51

## 52 INTRODUCTION

53 How genetic variation translates into phenotypic variation is of immense scientific interest  
54 (Weigel 2012). Among others, gene duplication followed by functional divergence is an  
55 important source of evolutionary complexity and innovation in multicellular organisms  
56 (Ohno 1970; Lynch and Conery 2000; Lynch and Katju 2004). Many gene pairs after  
57 duplication revert to single gene state but the ones that sustained undergo functionalization.  
58 The Arabidopsis genome underwent several duplication events which resulted in large  
59 number of homologous genes and regions across the genome (Blanc and Wolfe 2004;  
60 Ambrosino *et al.* 2016; Panchy *et al.* 2016). The functional importance of homologs has been  
61 demonstrated in various aspects of plant signaling and metabolism (Briggs *et al.* 2006). But,  
62 whether and how the differentiation in duplicate gene expression contributes to accession  
63 variation in Arabidopsis is not known.

64

65 Studies have shown that divergence of many duplicate genes occurs by expression divergence  
66 among and within species (Gu *et al.* 2004; Li *et al.* 2005). This phenomenon expands gene  
67 regulatory networks and contributes to physiological and morphological diversity (Carroll  
68 2000; Lynch and Conery 2000; Gu *et al.* 2004; Rensing 2014). In Arabidopsis, about two-  
69 thirds of duplicates were shown to exhibit expression divergence (Haberer *et al.* 2004). An  
70 evolutionary study on gene duplication revealed that duplicate genes show a high degree of  
71 variance in expression within species and suggested that this variation partly depends upon  
72 the biological function of the gene involved (Kliebenstein 2008). Another study also found  
73 high variance of duplicated gene expression between closely related *A. thaliana* and *A.*  
74 *arenosa* (Ha *et al.* 2009).

75

76 Functional redundancy among homologs is widespread in Arabidopsis, since several single  
77 loss-of-function mutants lack phenotype (Briggs *et al.* 2006). Homologous genes can be  
78 either fully or partially redundant. But, when two homologous genes show unequal genetic  
79 redundancy, a mutation in one of them causes a phenotype and the phenotype is enhanced  
80 when the other homolog is mutated as well. Interestingly, the defect in the other homolog  
81 itself doesn't result in any phenotype on its own. For example, the receptor-like kinase gene  
82 *BRASSINOSTEROID INSENSITIVE 1 (BRI1)* is accompanied by its close homolog *BRI1-*  
83 *LIKE1 (BRL1)*. Although *brl1* lacks a mutant phenotype it enhances the severe dwarf  
84 phenotype of *bri1* mutants (Caño-Delgado *et al.* 2004). This kind of unequal functional  
85 redundancy can be explained by divergence in duplicate expression, however, their  
86 perseverance in plant genome is under debate given the dispensable nature of the duplicate.

87

88 Genetic factors involved in plant morphogenesis will have crucial role in the differentiation  
89 of various Arabidopsis accessions. Tissue morphogenesis in Arabidopsis requires the cell  
90 wall-localized GPI-anchored  $\beta$ -1,3 glucanase ZERZAUST (*ZET*) (Vaddepalli *et al.* 2017).  
91 *ZET* was initially identified as a genetic component of the *STRUBBELIG (SUB)* signaling  
92 pathway along with QUIRKY, a C2 domain containing protein (Fulton *et al.* 2009). Absence  
93 of *ZET* results in a so-called *strubbelig-like mutant (slm)* phenotype characterized by  
94 abnormal integument initiation and outgrowth, aberrant floral organ and stem morphology,  
95 reduced plant height and irregular leaf shape.

96 Our previous studies have shown that mutations in *SUB* and *QKY* in Col background result in  
97 obvious *slm* mutant phenotypes (Fulton *et al.* 2009; Vaddepalli *et al.* 2011, 2014). But in the  
98 current work, we discovered that *ZET* acts differently in Col accession due to the presence of  
99 the close homolog *ZERZAUST HOMOLOG (ZETH)*. Using genetic and gene expression tools  
100 we show how *ZET* and *ZETH* diverged between the two common laboratory accessions Col

101 and *Ler* in terms of expression and function. Furthermore, we try to understand the  
102 contribution of the weakly expressing redundant homolog on the morphological diversity of  
103 accessions.

## 104 **RESULTS**

### 105 **Molecular identification of *ZETH***

106 In *Ler* background, *zet-1* carrying a loss-of-function mutation in *ZET* locus (At1g64760) (Fig.  
107 1A,B), shows a strong *slm* mutant phenotype (Vaddepalli *et al.* 2017) (Fig. 1D,F). Except one  
108 amino acid in the signal peptide, *ZET* shows no difference between Col and *Ler*. We  
109 investigated the functionality of *ZET* in Columbia accession by analyzing two available T-  
110 DNA insertion lines (*zet-3* and *zet-4*) (Fig. 1A). We expected the T-DNA insertion in *zet-4* to  
111 cause a mutant phenotype as it is predicted to result in a truncated *ZET* protein (Fig. 1A,B).  
112 But, the plants surprisingly failed to display the twisted morphology, characteristic of *slm*  
113 mutants (Fig. S1B). We asked, if the observed accession-specific phenotypic differences  
114 could relate to a close homolog of *ZET*. A BLAST search with the *ZET* coding sequence  
115 revealed that *ZET* is most closely related to At2g19440 with 89 percent identity at the amino  
116 acid level (Fig. S1A). We named this gene *ZERZAUST HOMOLOG (ZETH)*. *ZET* and *ZETH*  
117 form a subclade within the larger  $\beta$  clade of  $\beta$ -1,3 glucanase (BG) genes, which comprises 11  
118 members (Doxey *et al.* 2007; Gaudioso-Pedraza and Benitez-Alfonso 2014). Sequence-based  
119 analysis of the evolutionary history revealed that *ZET* and *ZETH* duplication is specific to  
120 species within the Arabidopsis lineage (Fig. S2).

121

122 To assess *ZETH* activity in Col, we investigated a T-DNA line (*zeth-1*), which is presumed to  
123 carry a truncated protein (Fig. 1A,B). But, like *zet-4*, the *zeth-1* insertion line also failed to  
124 show a mutant phenotype (Fig. S1C). However, the *zet-4* and *zeth-1* double mutant exhibited  
125 a strong phenotype (Fig. 1G-I, S1D) suggesting that the two genes act redundantly. The

126 double mutant resembled *zet-1* plants except for appearing less bushy but with exaggerated  
127 twisting of flowers and increased sterility. Nevertheless, we could complement the double  
128 mutant plants by introducing a construct encoding a translational fusion of ZET to the GFP  
129 variant T-Sapphire driven by the endogenous *ZET* promoter (pZET::TS:ZET), ruling out the  
130 contribution of any other background mutation (Fig. 1J). This construct was used in a  
131 previous study to complement *zet-1* mutants in *Ler* background (Vaddepalli *et al.* 2017).

132

### 133 **Accession-specific regulation of *ZET* and *ZETH* expression**

134 Next, we analyzed the expression pattern of *ZET* and *ZETH* in *Col* and *Ler* accessions to  
135 assess the cause for the mutant phenotype disparities between the two accessions. Our qPCR  
136 data from various tissues revealed that these genes are co-expressed (Fig. 2A). Surprisingly,  
137 we found much lower levels of *ZETH* transcripts in comparison to *ZET*. Moreover, *ZETH*  
138 expression was even further reduced in *Ler* where it was barely detectable in rosette leaves,  
139 stems, or flowers. Additional qPCR tests revealed that *ZET* and *ZETH* expression levels in  
140 seedlings and flowers undergo compensatory regulation in the *zeth-1* and *zet-4* mutants in  
141 *Col*, respectively (Fig. 2B). This result provides evidence for redundant functions of *ZET* and  
142 *ZETH* in the *Col* background and thus offers a convenient explanation for the lack of  
143 phenotype in single mutants in this accession. Interestingly, this compensatory regulation  
144 appears to be absent in flowers of *Ler* accession since *ZETH* expression was not detectably  
145 upregulated in *zet-1* mutant.

146

### 147 ***Ler* carries a functional *ZETH* gene**

148 Despite minimal *ZETH* expression profiles in both accessions, appearance of prominent  
149 phenotypes only in *Ler*, when *zet* is mutated, can be attributed to any or all of the following  
150 reasons. It could be because of the low expression of *ZETH*, the lack of compensatory

151 mechanism, or the *Ler* version of ZETH exhibiting a different amino acid composition when  
152 compared to Col which might affect its activity. The *Ler*/Col variants of ZET differ by only  
153 one amino acid at position 3 in the predicted signal peptide (change from an asparagine to a  
154 lysine) but there are nine amino acid differences between the *Ler*/Col variants of ZETH (Fig  
155 3A). We wanted to test if these changes affect the activity of ZETH in *Ler*. For this purpose,  
156 we replaced the *ZET* coding sequence 3' to the predicted signal peptide with the equivalent  
157 *Ler* or Col variants of *ZETH* sequence in our complementing pZET::TS:ZET reporter  
158 (Vaddepalli *et al.* 2017). This resulted in *zet-1* plants transgenic for the *Ler* or Col variants of  
159 *ZETH*, under the control of the native *ZET* promoter (*pZET::TS:ZETHL/C zet-1*).  
160 Interestingly, the T1 plants of the transgenic *zet-1* lines exhibited a wild-type phenotype with  
161 both variants (Figures 3B-G) (80/80 (*TS:ZETHL*), 167/172 (*TS:ZETHC*)) indicating that the  
162 accession-specific amino acid alterations do not affect ZETH function.

163

164 Although *ZETH* of *Ler* is functional, its expression is quite weak indicating its functional  
165 contribution is perhaps insignificant. But, *zet1 zeth-1* double mutants in Col accession exhibit  
166 a stronger phenotype compared to *zet-1* (*Ler*) (Fig. 1G-J). These interesting observations  
167 prompted us to check whether *ZETH* has some residual activity in *Ler* even though its  
168 expression is very low. Using CRISPR\Cas9 technique (Wang *et al.* 2015) we generated a  
169 mutation in the first exon of *ZETH* in the *zet-1* background. The novel allele *zeth-2* is  
170 predicted to result in a truncated ZETH protein consisting of only the first 80 amino acids  
171 (Fig. 1A,B). Surprisingly, *zet-1 zeth-2* double mutant plants in *Ler* showed an exaggerated  
172 *zet-1* phenotype and appeared closer to *zet-4 zeth-1* double mutants in the Columbia  
173 background (Fig. 3H-J). The finding indicates that the weakly expressed *ZETH* in *Ler*  
174 exhibits residual activity, which is insufficient to fully substitute for the lack of *ZET*.

175

176 ***ZETH* acts in a dose dependent manner**

177 Thus far, our results have established the functional role for the weakly expressed *ZETH* in  
178 both Col and *Ler* accessions, implying small amount of *ZETH* protein can have a noticeable  
179 impact. Next, we asked if this gene is acting in a dose-dependent manner. For this purpose,  
180 we checked the effect of *ZETH* gene copy number on *zet* mutant phenotype (Fig. 4).  
181 Interestingly in the *Ler* background, *zet-1 zeth-2/+* displayed an intermediate phenotype  
182 between the single *zet-1* mutant and the double *zet-1 zeth-2* mutant. The leaf petioles are  
183 somewhat elongated in *zet-1* with narrow blades. This phenotype got slightly enhanced in *zet-*  
184 *1 zeth-2/+* background, whereas *zet-1 zeth-2* double mutants show further worsening of the  
185 phenotype. The phenomenon of dosage-dependent enhancement of mutant phenotype was  
186 also observed for floral organs and was particularly obvious for siliques depending on the  
187 *ZETH* copy number. Surprisingly, in Columbia background the *zet-4 zeth-1/+* mutant showed  
188 wild type morphology in all the organs tested except siliques which displayed shortening of  
189 length with no twisting. Despite these peculiarities between accessions, the observations  
190 indicate that mutation in *zeth* contributes to the overall exaggerated morphologies of double  
191 mutants in a dose dependent manner. Our results also imply that the extent of the *ZETH*  
192 effect on plant morphology is accession dependent.

193

194 ***ERECTA* influences the *zet-1* phenotype**

195 Col and *Ler* accessions display obvious discrepancies in their phenotypic appearance. For  
196 example, *Ler* exhibits shorter stems and more compact inflorescences (Passardi *et al.* 2007).  
197 The phenotypic differences could be ascribed to genetic variability between the accessions  
198 and the contribution of accession-specific modifiers needs to be addressed. Major difference  
199 between the Col and *Ler* accessions is the lack of *ERECTA* (*ER*) in the *Ler* background.  
200 Previous work revealed that *SUB* and *QKY* show a synergistic interaction with *ERECTA* (*ER*)



201 with respect to the control of plant height (Vaddepalli *et al.* 2011, 2014). We investigated the  
202 phenotype of *zet-1* (*Ler*) plants transformed with pKUT196, a plasmid carrying 9.3 kb of  
203 Col-0 DNA spanning the entire genomic *ER* locus (Torii *et al.* 1996; Godiard *et al.* 2003).  
204 Like other *slms*, *zet-1 ER* transgenic plants also exhibited ameliorated plant height and stem  
205 twisting whereas aberrant floral organ phenotype appeared unaffected by the *ER* transgene  
206 (Fig. 5). Our result exemplifies the influence of accession-specific modifiers on plant  
207 morphology.

208

## 209 **DISCUSSION**

210 Numerous studies have shown the compensation of gene loss by duplicate genes implying  
211 that close homologs give robustness to the plants against mutations (Hanada *et al.* 2009).  
212 Studies have also shown stronger reduction in duplicate expression and this expression  
213 divergence was noted as an important innovation for conservation of the duplicate gene  
214 (Ganko *et al.* 2007; Panchy *et al.* 2016). Despite acknowledging this interesting pattern,  
215 examples are missing that show functional relevance of gene duplicates, since retention of  
216 almost identical duplicates goes against the evolutionary instability of genetic redundancy  
217 (Lynch and Conery 2000). Here, our work reveals an unexpected variation of a weakly  
218 expressed gene and its homolog between accessions. Our results imply that divergence in  
219 duplicate expression may play a crucial role in accession-specific genetic adaptations.

220

221 Redundancy between duplicate genes by a compensation mechanism via feedback responsive  
222 circuit serves as an advantage for biological systems to overcome stochastic fluctuations in  
223 signaling pathways (Kafri *et al.* 2006, 2009). In the Col background, an overall higher  
224 expression level of *ZETH*, in combination with a compensatory upregulation in *zet-4* mutants  
225 seems to account for their wild-type appearance. Although this phenomenon is absent in *Ler*,

226 the residual expression of *ZETH* in *Ler* seems to be above the threshold, otherwise the *zet-1*  
227 *zeth-2* double mutant would have resembled the single mutant *zet-1*. Furthermore,  
228 understated changes in expression pattern may further enhanced by tissue level sampling.  
229 Although segregating mutants in Col background appear to be fine morphologically, we may  
230 have missed subtler cellular phenotypes in our analysis. All the experiments were performed  
231 in controlled lab conditions. There is also a possibility that *ZETH* may express at higher  
232 levels under different conditions and reveal a novel function. Indeed, the role of SUB in  
233 coordinating cell proliferation and differentiation during leaf development was revealed only  
234 at high ambient temperature of 30 °C (Lin *et al.* 2012).

235  
236 Initially, we assumed *ZETH* in *Ler* background as a pseudogene, since a previous RNA-seq  
237 analysis has found that *ZETH* transcripts were undetectable in young *Ler* flowers (Jiao and  
238 Meyerowitz 2010). Although our qRT-PCR results showed *ZETH* expression, the  
239 functionality was still in question given the very low expression pattern in all the tissues  
240 tested. But, surprisingly our results indicate that weakly expressed *ZETH* is functionally very  
241 relevant. Our results also highlight the importance of gene specific analysis, since in large  
242 scale studies differentiating between identical duplicate sequences is challenging. Thus, small  
243 expression differences are often overlooked as the focus goes inadvertently on highly  
244 expressed genes.

245  
246 Previous evidence indicated that *slms* may have additional functions apart from their role in  
247 plant development (Fulton *et al.* 2009). Transcriptome analysis showed that several *ZET*  
248 responsive genes are related to biotic and abiotic stress responses. It is intriguing to speculate  
249 that the high expression of *ZET* might be attributed to its stress related functions since  
250 minimal *ZETH* expression in Col was enough for wild type appearance of *zet-4* mutants.

251 Future experiments could test this possibility by assessing if *zet* is more susceptible to stress  
252 compared to *zeth*. Interestingly, *ZET* transcript level was shown to be altered in Arabidopsis  
253 plants infected with *Fusarium oxysporum* (Fallath *et al.* 2017). Thus, further analysis of *ZET*  
254 may reveal its potential role in adaptation, apart from morphogenesis.

255

256 Duplicate genes provide mutational robustness to living organisms. In yeast and  
257 *Caenorhabditis elegans*, functional compensation by the duplicated gene displayed higher  
258 robustness to gene perturbation than singletons (Gu *et al.* 2003; Conant and Wagner 2004).  
259 But, *ZETH* showed a highly reduced expression pattern compared to *ZET*. Such a reduction in  
260 expression was proposed to facilitate the retention of duplicates and the conservation of their  
261 ancestral functions (Qian *et al.* 2010). In this scenario, loss of either of the duplicate genes  
262 renders the total expression level lower than normal which would hamper the function. This  
263 also inhibits functional divergence of duplicated genes and helps in rebalancing gene dosage  
264 after duplication. Interestingly, with *ZET* this phenomenon was observed only in *Ler*, where  
265 mutating *ZET* was enough for the manifestation of phenotype, but not in the *Col* background.  
266 These results indicate that the divergent behavior of duplicates may vary depending on the  
267 accession and the specific gene pair under study. Since the *ER* locus was able to partially  
268 alleviate *zet-1* mutant phenotype, the influence of accession-specific differences on gene  
269 contribution needs to be considered. Further, it would be interesting to know if there exists a  
270 correlation between accession-specific modifiers and expression divergence of certain  
271 duplicates.

272

273 A study on homologs revealed significant diversity in expression pattern among different  
274 accessions of Arabidopsis (Kliebenstein 2008). For instance, background specific regulation  
275 and unequal genetic redundancy has been observed for *BRI1* (Caño-Delgado *et al.* 2004;

276 Zhou *et al.* 2004). In another example, the sucrose transporter AtSUC1 was shown to have  
277 differential tissue expression pattern depending on the accession it was tested (Feuerstein *et*  
278 *al.* 2010). The observed accession-specific disparities in *ZETH* expression levels may relate  
279 to differences in its *cis*-regulatory region, either caused by DNA polymorphisms, as was  
280 found for the tomato *fw2.2*, rice *qSH1*, or Arabidopsis *FLOWERING LOCUS (FT)* loci  
281 (Konishi *et al.* 2006; Cong *et al.* 2008; Schwartz *et al.* 2009; Liu *et al.* 2014), or by  
282 epigenetic variation (Durand *et al.* 2012). Thus, our work provides an interesting example for  
283 the diversification of *cis* and/or *trans* regulatory elements between two Arabidopsis  
284 accessions. A correlation between duplicate divergence and evolution of *cis*-regulatory  
285 elements and networks was observed (Arsovski *et al.* 2015). But, how the transcriptional  
286 networks regulate the levels of the duplicated genes and their role in the context of evolution  
287 is largely unexplored. Further studies, using the various Arabidopsis accessions available,  
288 could help in understanding the role of expression divergence among duplicates in  
289 differentiation of accessions.

290

## 291 **MATERIALS AND METHODS**

### 292 **Plant work, Plant Genetics and Plant Transformation**

293 *Arabidopsis thaliana* (L.) Heynh. var. Columbia (Col-0) and var. Landsberg (*erecta* mutant)  
294 (*Ler*) were used as wild-type strains. Plants were grown as described earlier (Fulton *et al.*  
295 2009). The *zet-1* mutant was described previously (Vaddepalli *et al.* 2017). T-DNA insertion  
296 lines were received from the GABI-KAT (*zet-3*, GABI-KAT-460G06) (Kleinboelting *et al.*  
297 2012) and Wisconsin collections (*zet-4*, WiscDsLoxHs057\_03H; *zeth-1*,  
298 WiscDsLoxHs066\_12G) (Sussman *et al.* 2000). Plants were transformed with different  
299 constructs using *Agrobacterium* strain GV3101/pMP90 (Koncz and Schell 1986) and the  
300 floral dip method (Clough and Bent 1998). Transgenic T1 plants were selected on

301 Hygromycin (20 µg/ml) or Glufosinate (Basta) (10 µg/ml) plates and transferred to soil for  
302 further inspection.

303

### 304 **Recombinant DNA work**

305 For DNA and RNA work standard molecular biology techniques were used. PCR-fragments  
306 used for cloning were obtained using Phusion high-fidelity DNA polymerase (New England  
307 Biolabs, Frankfurt, Germany) or TaKaRa PrimeSTAR HS DNA polymerase (Lonza, Basel,  
308 Switzerland). PCR fragments were subcloned into pLitmus 28i (NEB). All PCR-based  
309 constructs were sequenced. Primer sequences used for cloning and qRT PCR in this work are  
310 listed in S1 Table.

311

### 312 **Cloning**

313 Genomic fragments of *ZETH* were amplified from Col-0 and *Ler* backgrounds using primers  
314 ZETHCol\_F/ZETHCol\_R and ZETHLer\_F/ZETHLer\_R and sub cloned into pZET::TS:ZET  
315 (Vaddepalli *et al.* 2017) using XmaI/BamHI restriction sites to obtain pZET::TS:ZETHCol  
316 and pZET::TS:ZETHLer respectively. For CRISPR/cas9 *ZETH* construct, the egg cell-  
317 specific promoter-controlled CRISPR/Cas9 system was used as described (Wang *et al.* 2015).  
318 *zet-1* plants were transformed with the CRISPR/cas9 *ZETH* construct by floral dip method.  
319 T1 plants were screened for exaggerated phenotype and *ZETH* locus was sequenced for  
320 identifying the mutation.

321

### 322 **Quantitative RT-PCR analysis**

323 Tissue for quantitative real-time PCR (qPCR) was harvested from plants grown in long day  
324 conditions. With minor changes, tissue collection, RNA extraction and quality control were  
325 performed as described previously (Box *et al.* 2011). RT-PCR was performed on Biorad

326 CFX96 by using iQ SYBR Green Supermix (Bio-Rad) according to the manufacturer's  
327 recommendations. All expression data were normalized against reference genes At5g25760,  
328 At4g33380, and At2g28390 by using the  $\Delta\Delta$ -Ct method (Czechowski 2007). Experiments  
329 were performed in biological and technical triplicates.

330

## 331 **ACKNOWLEDGEMENTS**

332 We acknowledge Maxi Oelschner for technical assistance. We also thank Dolf Weijers and  
333 Sumanth Mutte for their constructive feedback on the manuscript. This work was funded by  
334 the German Research Council (DFG) through grants SCHN 723/6-1 and SFB924 (TP A2) to  
335 KS.

## 336 **AUTHOR CONTRIBUTIONS**

337 P.V. and K.S. designed the research. P.V and L.F. performed experiments. P.V. and K.S.  
338 analyzed the data. P.V. wrote the paper.

## 339 **REFERENCES**

340

341 Ambrosino, L., H. Bostan, P. di Salle, M. Sangiovanni, A. Vigilante *et al.*, 2016 pATsi:  
342 Paralogs and Singleton Genes from *Arabidopsis thaliana*. *Evol Bioinform Online* 12: 1–7.

343

344 Arsovski, A. A., J. Pradinuk, X. Guo, S. Wang, and K. L. Adams, 2015 Evolution of Cis-  
345 Regulatory Elements and Regulatory Networks in Duplicated Genes of *Arabidopsis*. *Plant*  
346 *Physiology* 169: 2982–2991.

347

348 Blanc, G., and K. H. Wolfe, 2004 Widespread Paleopolyploidy in Model Plant Species  
349 Inferred from Age Distributions of Duplicate Genes. *Plant Cell Online* 16: 1667–1678.

350

351 Box, M. S., V. Coustham, C. Dean, and J. S. Mylne, 2011 Protocol: A simple phenol-based  
352 method for 96-well extraction of high quality RNA from *Arabidopsis*. *Plant Methods* 7: 7.

353

354 Briggs, G. C., K. S. Osmond, C. Shindo, R. Sibout, and C. S. Hardtke, 2006 Unequal genetic  
355 redundancies in *Arabidopsis* – a neglected phenomenon? *Trends in Plant Science* 11: 492–

- 356 498.  
357  
358 Caño-Delgado, A., Y. Yin, C. Yu, D. Vafeados, S. Mora-García *et al.*, 2004 BRL1 and BRL3  
359 are novel brassinosteroid receptors that function in vascular differentiation in Arabidopsis.  
360 Development 131: 5341–5351.  
361  
362 Carroll, S. B., 2000 Endless Forms The Evolution of Gene Regulation and Morphological  
363 Diversity. Cell 101: 577–580.  
364  
365 Clough, S. J., and A. F. Bent, 1998 Floral dip: a simplified method for *Agrobacterium*-  
366 mediated transformation of *Arabidopsis thaliana*. The Plant Journal 16: 735–743.  
367  
368 Conant, G. C., and A. Wagner, 2004 Duplicate genes and robustness to transient gene knock-  
369 downs in *Caenorhabditis elegans*. Proc Royal Soc Lond Ser B Biological Sci 271: 89–96.  
370  
371 Cong, B., L. S. Barrero, and S. D. Tanksley, 2008 Regulatory change in YABBY-like  
372 transcription factor led to evolution of extreme fruit size during tomato domestication. Nature  
373 Genetics 40: 800–804.  
374  
375 Czechowski, T., 2007 Genome-Wide Identification and Testing of Superior Reference Genes  
376 for Transcript Normalization in Arabidopsis. PLANT PHYSIOLOGY 139: 5–17.  
377  
378 Doxey, A. C., M. W. Yaish, B. A. Moffatt, M. Griffith, and B. J. McConkey, 2007 Functional  
379 divergence in the Arabidopsis  $\beta$ -1, 3-glucanase gene family inferred by phylogenetic  
380 reconstruction of expression states. Molecular biology and evolution 24: 1045–1055.  
381  
382 Durand, S., N. Bouché, E. Strand, O. Loudet, and C. Camilleri, 2012 Rapid Establishment of  
383 Genetic Incompatibility through Natural Epigenetic Variation. Current Biology 22: 326–331.  
384  
385 Fallath, T., B. N. Kidd, J. Stiller, C. Davoine, S. Björklund *et al.*, 2017 MEDIATOR18 and  
386 MEDIATOR20 confer susceptibility to *Fusarium oxysporum* in *Arabidopsis thaliana*. Plos  
387 One 12: e0176022.  
388  
389 Feuerstein, A., M. Niedermeier, K. Bauer, S. Engelmann, S. Hoth *et al.*, 2010 Expression of  
390 the AtSUC1 gene in the female gametophyte, and ecotype-specific expression differences in  
391 male reproductive organs. Plant Biology 12: 105–114.  
392  
393 Fulton, L., M. Batoux, P. Vaddepalli, R. Yadav, W. Busch *et al.*, 2009 DETORQUEO,  
394 QUIRKY, and ZERZAUST represent novel components involved in organ development  
395 mediated by the receptor-like kinase STRUBBELIG in *Arabidopsis thaliana*. PLoS genetics  
396 5: e1000355.  
397  
398 Ganko, E. W., B. C. Meyers, and T. J. Vision, 2007 Divergence in Expression between  
399 Duplicated Genes in Arabidopsis. Molecular Biology and Evolution 24: 2298–2309.  
400  
401 Gaudioso-Pedraza, R., and Y. Benitez-Alfonso, 2014 A phylogenetic approach to study the

- 402 origin and evolution of plasmodesmata-localized glycosyl hydrolases family 17. *Frontiers in*  
403 *Plant Science* 5:.
- 404
- 405 Godiard, L., L. Sauviac, K. U. Torii, O. Grenon, B. Mangin *et al.*, 2003 ERECTA, an LRR  
406 receptor-like kinase protein controlling development pleiotropically affects resistance to  
407 bacterial wilt. *The Plant Journal* 36: 353–365.
- 408
- 409 Gu, Z., S. A. Rifkin, K. P. White, and W.-H. Li, 2004 Duplicate genes increase gene  
410 expression diversity within and between species. *Nature Genetics* 36: ng1355.
- 411
- 412 Gu, Z., L. M. Steinmetz, X. Gu, C. Scharfe, R. W. Davis *et al.*, 2003 Role of duplicate genes  
413 in genetic robustness against null mutations. *Nature* 421: nature01198.
- 414
- 415 Haberer, G., T. Hindemitt, B. C. Meyers, and K. Mayer, 2004 Transcriptional Similarities,  
416 Dissimilarities, and Conservation of cis-Elements in Duplicated Genes of Arabidopsis. *Plant*  
417 *Physiol* 136: 3009–3022.
- 418
- 419 Ha, M., E.-D. Kim, and J. Z. Chen, 2009 Duplicate genes increase expression diversity in  
420 closely related species and allopolyploids. *Proceedings of the National Academy of Sciences*  
421 106: 2295–2300.
- 422
- 423 Hanada, K., T. Kuromori, F. Myouga, T. Toyoda, W.-H. Li *et al.*, 2009 Evolutionary  
424 Persistence of Functional Compensation by Duplicate Genes in Arabidopsis. *Genome*  
425 *Biology and Evolution* 1: 409–414.
- 426
- 427 Jiao, Y., and E. M. Meyerowitz, 2010 Cell-type specific analysis of translating RNAs in  
428 developing flowers reveals new levels of control. *Molecular systems biology* 6:.
- 429
- 430 Kafri, R., M. Levy, and Y. Pilpel, 2006 The regulatory utilization of genetic redundancy  
431 through responsive backup circuits. *Proceedings of the National Academy of Sciences* 103:  
432 11653–11658.
- 433
- 434 Kafri, R., M. Springer, and Y. Pilpel, 2009 Genetic Redundancy: New Tricks for Old Genes.  
435 *Cell* 136: 389–392.
- 436
- 437 Kleinboelting, N., G. Huep, A. Kloetgen, P. Viehoveer, and B. Weisshaar, 2012 GABI-Kat  
438 SimpleSearch: new features of the Arabidopsis thaliana T-DNA mutant database. *Nucleic*  
439 *Acids Research* 40: D1211–D1215.
- 440
- 441 Kliebenstein, D. J., 2008 A Role for Gene Duplication and Natural Variation of Gene  
442 Expression in the Evolution of Metabolism. *Plos One* 3: e1838.
- 443
- 444 Koncz, C., and J. Schell, 1986 The promoter of TL-DNA gene 5 controls the tissue-specific  
445 expression of chimaeric genes carried by a novel type of Agrobacterium binary vector. *MGG*  
446 *Molecular & General Genetics* 204: 383–396.
- 447



- 448 Konishi, S., T. Izawa, S. Lin, K. Ebana, Y. Fukuta *et al.*, 2006 An SNP Caused Loss of Seed  
449 Shattering During Rice Domestication. *Science* 312: 1392–1396.  
450
- 451 Lin, L., S.-H. Zhong, X.-F. Cui, J. Li, and Z.-H. He, 2012 Characterization of temperature-  
452 sensitive mutants reveals a role for receptor-like kinase SCRAMBLED/STRUBBELIG in  
453 coordinating cell proliferation and differentiation during Arabidopsis leaf development. *The*  
454 *Plant Journal* 72: 707–720.  
455
- 456 Liu, L., J. Adrian, A. Pankin, J. Hu, X. Dong *et al.*, 2014 Induced and natural variation of  
457 promoter length modulates the photoperiodic response of FLOWERING LOCUS T. *Nature*  
458 *Communications* 5: 4558.  
459
- 460 Li, W.-H., J. Yang, and X. Gu, 2005 Expression divergence between duplicate genes. *Trends*  
461 *Genet* 21: 602–607.  
462
- 463 Lynch, M., and J. S. Conery, 2000 The Evolutionary Fate and Consequences of Duplicate  
464 Genes. *Science* 290: 1151–1155.  
465
- 466 Lynch, M., and V. Katju, 2004 The altered evolutionary trajectories of gene duplicates.  
467 *Trends Genet* 20: 544–549.  
468
- 469 Ohno, S., 1970 *Evolution by Gene Duplication*. Springer, New York.  
470
- 471 Panchy, N., M. Lehti-Shiu, and S.-H. Shiu, 2016 Evolution of Gene Duplication in Plants.  
472 *Plant Physiol* 171: 2294–2316.  
473
- 474 Passardi, F., J. Dobias, L. Valério, S. Guimil, C. Penel *et al.*, 2007 Morphological and  
475 physiological traits of three major Arabidopsis thaliana accessions. *J Plant Physiol* 164: 980–  
476 992.  
477
- 478 Qian, W., B.-Y. Liao, A. Chang, and J. Zhang, 2010 Maintenance of duplicate genes and  
479 their functional redundancy by reduced expression. *Trends Genet* 26: 425–430.  
480
- 481 Rensing, S. A., 2014 Gene duplication as a driver of plant morphogenetic evolution. *Current*  
482 *Opinion in Plant Biology* 17: 43–48.  
483
- 484 Schwartz, C., S. Balasubramanian, N. Warthmann, T. P. Michael, J. Lempe *et al.*, 2009 Cis-  
485 regulatory Changes at FLOWERING LOCUS T Mediate Natural Variation in Flowering  
486 Responses of Arabidopsis thaliana. *Genetics* 183: 723–732.  
487
- 488 Sussman, M. R., R. M. Amasino, J. C. Young, P. J. Krysan, and S. Austin-Phillips, 2000 The  
489 Arabidopsis Knockout Facility at the University of Wisconsin–Madison. *Plant Physiology*  
490 124: 1465–1467.  
491
- 492 Torii, K. U., N. Mitsukawa, T. Oosumi, Y. Matsuura, R. Yokoyama *et al.*, 1996 The  
493 Arabidopsis ERECTA gene encodes a putative receptor protein kinase with extracellular

- 494 leucine-rich repeats. *The Plant Cell Online* 8: 735–746.  
495
- 496 Vaddepalli, P., L. Fulton, M. Batoux, R. Yadav, and K. Schneitz, 2011 Structure-Function  
497 Analysis of STRUBBELIG, an Arabidopsis Atypical Receptor-Like Kinase Involved in  
498 Tissue Morphogenesis. *PLoS ONE* 6: e19730.  
499
- 500 Vaddepalli, P., L. Fulton, J. Wieland, K. Wassmer, M. Schaeffer *et al.*, 2017 The cell wall-  
501 localized atypical  $\beta$ -1,3 glucanase ZERZAUST controls tissue morphogenesis in *Arabidopsis*  
502 *thaliana*. *Development* dev.152231.  
503
- 504 Vaddepalli, P., A. Herrmann, L. Fulton, M. Oelschner, S. Hillmer *et al.*, 2014 The C2-domain  
505 protein QUIRKY and the receptor-like kinase STRUBBELIG localize to plasmodesmata and  
506 mediate tissue morphogenesis in *Arabidopsis thaliana*. *Development*.  
507
- 508 Wang, Z.-P., H.-L. Xing, L. Dong, H.-Y. Zhang, C.-Y. Han *et al.*, 2015 Egg cell-specific  
509 promoter-controlled CRISPR/Cas9 efficiently generates homozygous mutants for multiple  
510 target genes in *Arabidopsis* in a single generation. *Genome Biol* 16: 144.  
511
- 512 Weigel, D., 2012 Natural Variation in *Arabidopsis*: From Molecular Genetics to Ecological  
513 Genomics. *Plant Physiol* 158: 2–22.  
514
- 515 Zhou, A., H. Wang, J. C. Walker, and J. Li, 2004 BRL1, a leucine-rich repeat receptor-like  
516 protein kinase, is functionally redundant with BRI1 in regulating *Arabidopsis* brassinosteroid  
517 signaling. *Plant J* 40: 399–409.  
518

519 **FIGURES**

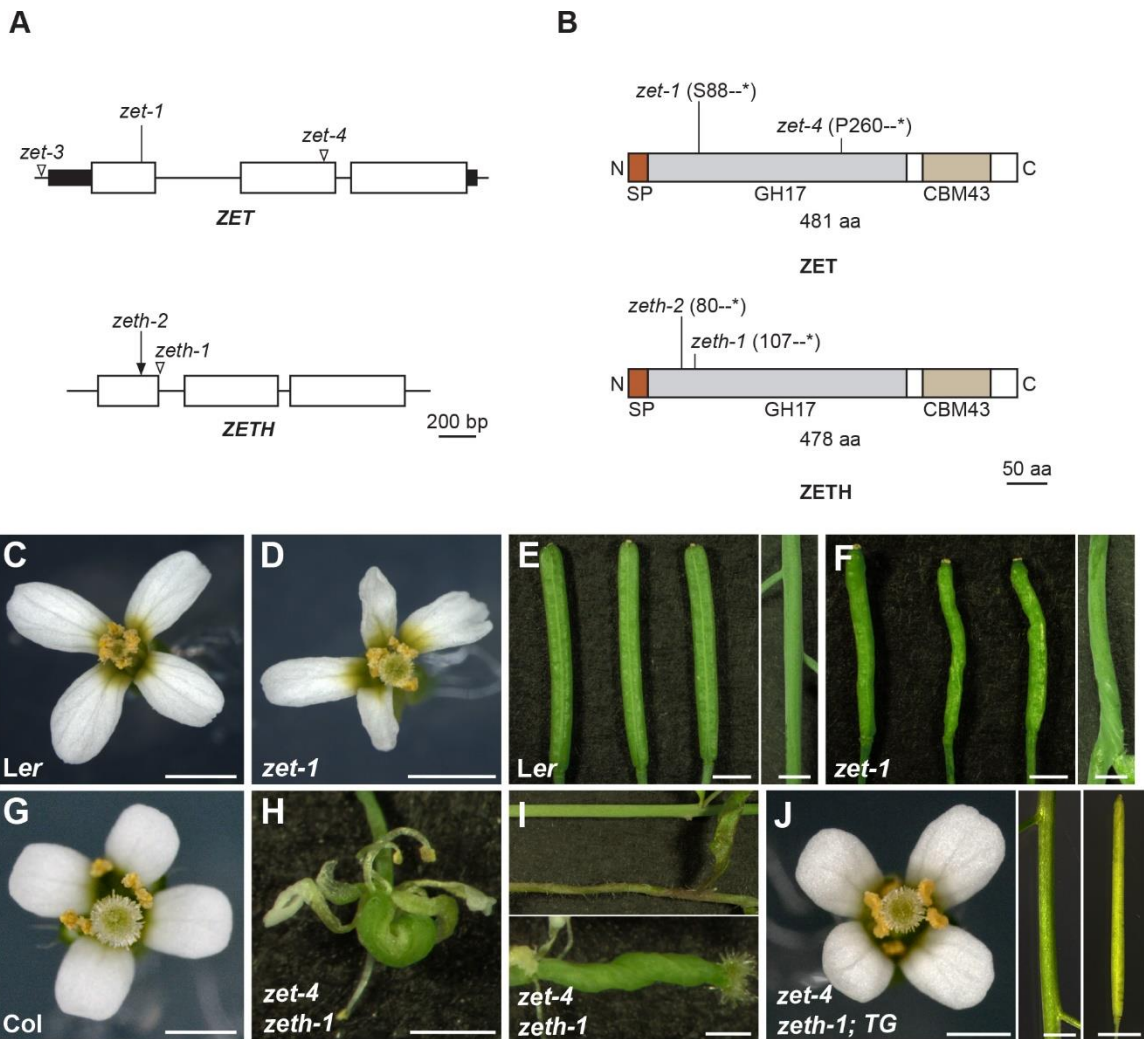

520

521 **Fig. 1. Molecular and genetic characterization of *ZET* and *ZETH*.** (A) Cartoon depicting  
 522 the genomic organization of *ZET* and *ZETH*. Horizontal lines represent introns. Filled  
 523 rectangles mark untranslated regions. The positions of EMS-, CRISPR-, and T-DNA-induced  
 524 mutations are denoted by lines, arrow, and open triangles, respectively. (B) Schematic view  
 525 of the predicted *ZET* protein. The signal peptide (SP), GH17 and CBM43/X8 domains are  
 526 highlighted. The position and effects of the *zet* mutations are indicated. Phenotypic analysis  
 527 (C-J). Comparison of (C, E) *Ler*. (D, F) *zet-1*, (G) *Col* and (H, I) *zet-4 zeth-1*. Note the  
 528 aberrant flower (D, H), stem and silique (F, I) morphology of mutants. Mutant phenotype is  
 529 strong in *zet-4 zeth-1* double mutant (H, I). (J) *zet-4 zeth-1* double mutant phenotype is  
 530 complemented by *pZET::TS:ZET* (*TG*). Scale bars: 1 mm

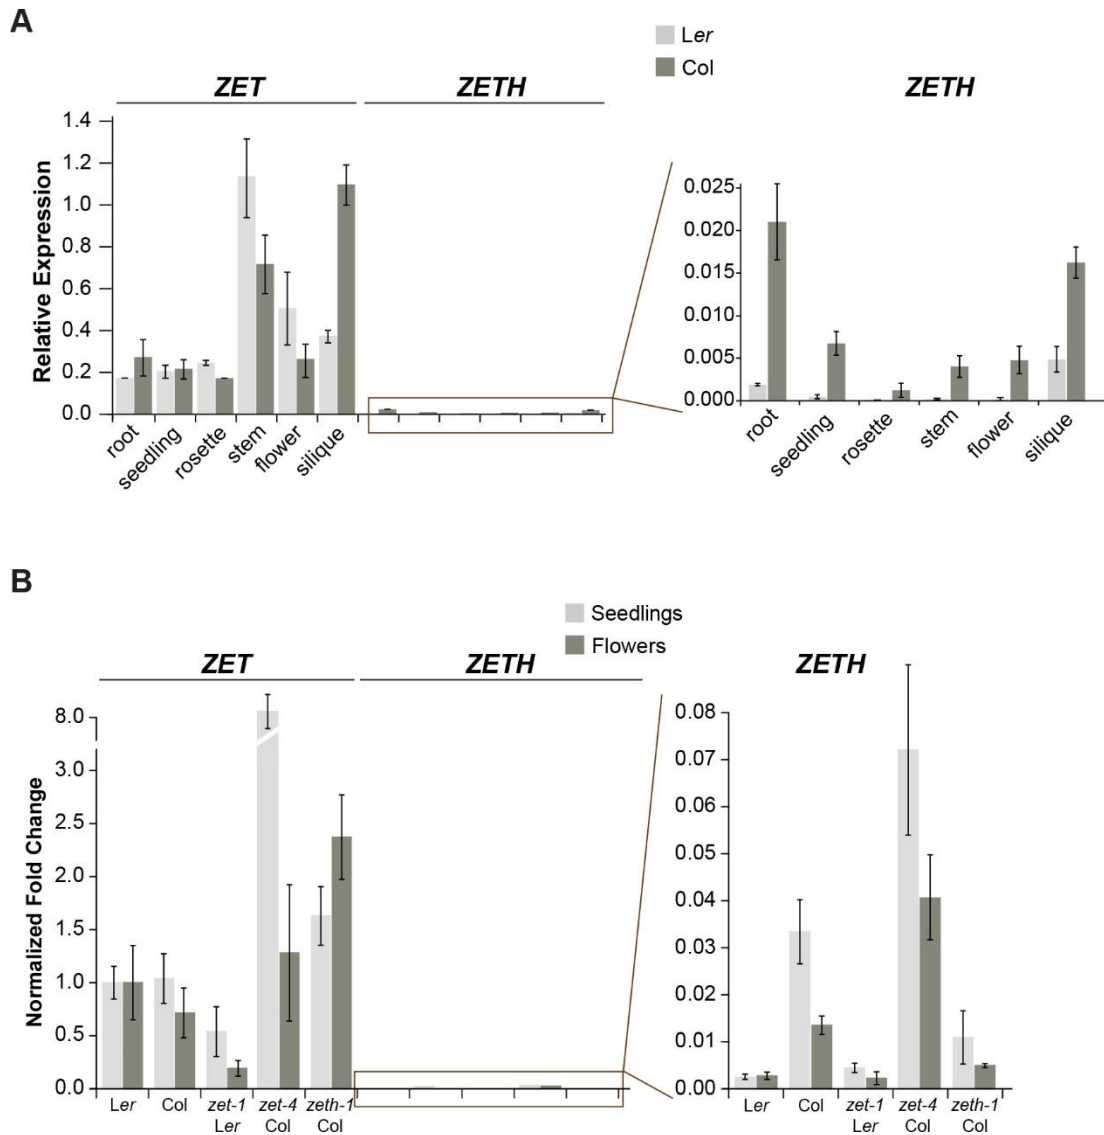

531

532 **Fig. 2. Expression analysis of *ZET* and *ZETH*.** (A) Tissue distribution of *ZET* and *ZETH*  
 533 transcript expression levels by qPCR. (n= 3 biological replicates). Means  $\pm$  SEMs are  
 534 indicated. Age of plants: roots and seedlings, 10 days; rosette, 3 weeks; stem, flowers (stages  
 535 1-12) and siliques (stage 17), 5 weeks. (B) Comparison of *ZET* and *ZETH* mRNA levels in  
 536 seedlings and stage 1-12 flowers of indicated mutants by qPCR. (n= 3 biological replicates).  
 537 Means  $\pm$  SEMs are indicated.

A

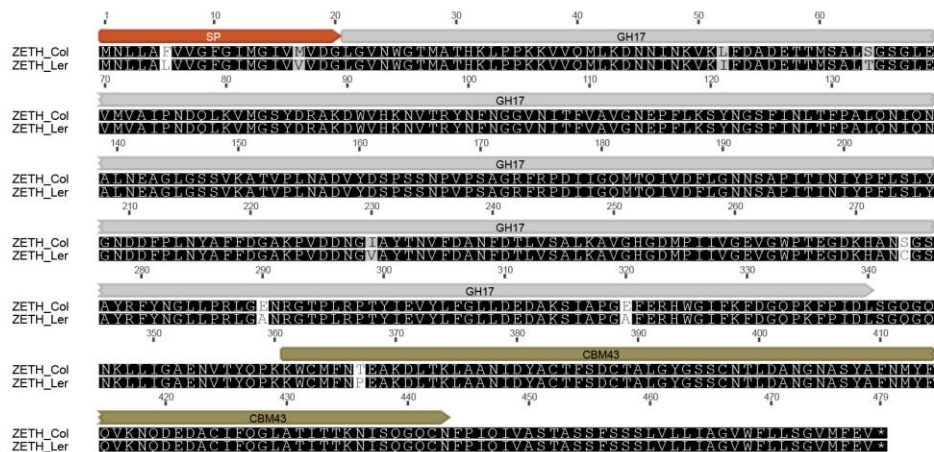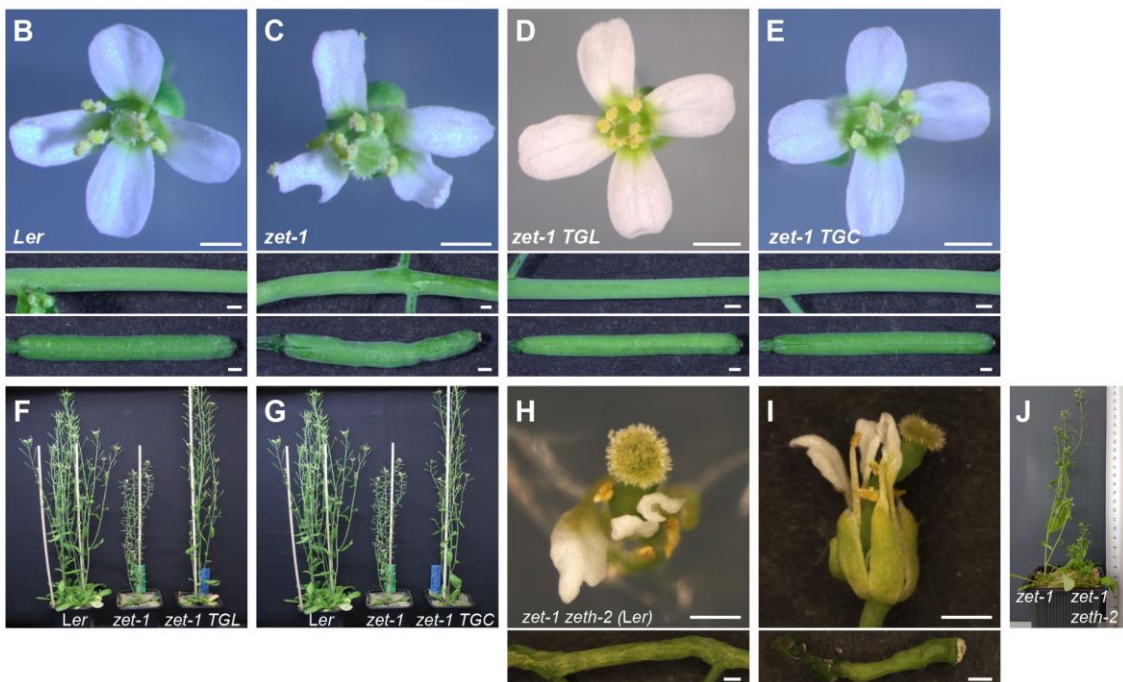

538

539 **Fig. 3. ZETH in *Ler* has residual function.** (C) Alignment of ZETH amino acid sequences  
 540 of Col and *Ler*. (B-E) Complementation of *zet-1* phenotype by two TS:ZET reporter  
 541 constructs. Upper panels: Stage 13 flower. Middle panel: siliques. Bottom panel: Stem.  
 542 Genotypes are indicated. (C) Note aberrant floral morphology. Siliques and stems are twisted.  
 543 (D, E) Note normal phenotype of a *zet-1* plant carrying either the *Ler* or Col variant of ZETH  
 544 under the control of the endogenous ZET (*Ler*) promoter (TGL: *pZET::TS:ZETH/Ler*, TGC:  
 545 *pZET::TS:ZETH/Col*). (F, G) Whole-plant appearance. Genotypes are indicated. (H-J)  
 546 Phenotype of *zet-1 zeth-2* (*Ler*) mutant. Mutant phenotype is exaggerated. Scale bars: 0.5  
 547 mm.

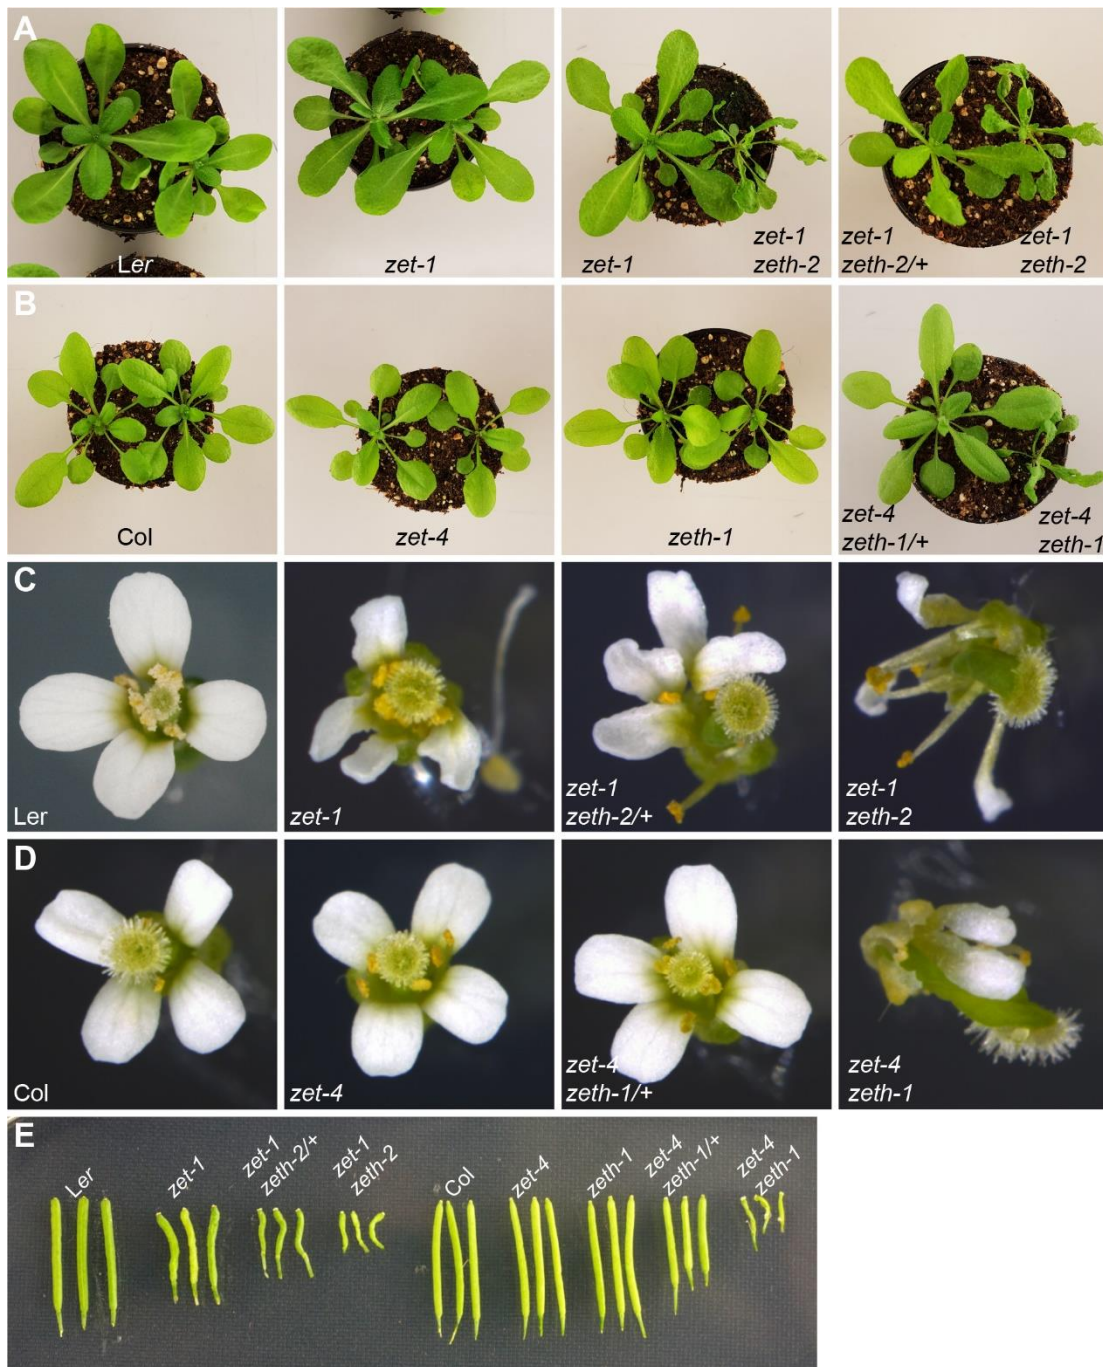

548

549 **Fig 4: ZETH acts in dosage dependent manner**

550 Genotypes are indicated. (A, B) Rosette leaves of three-week-old plants. (A) Notice slightly  
551 elongated petiole and narrow leaf blade phenotype in *zet-1*, which gets enhanced in *zet-1*  
552 *zeth-2/+* and *zet-1 zeth-2* mutants. (B) In Col background aberrant morphology is apparent  
553 only in double mutants *zet-4 zeth-1*. (C, D) Flowers. (E) Siliques. Similar to leaves, twisting  
554 morphology of flowers and siliques is exaggerated progressively in Ler mutants, but in Col  
555 only double mutant shows phenotype with the exception of siliques. Siliques of *zet-4 zeth-*  
556 *1/+* in Col are shorter.

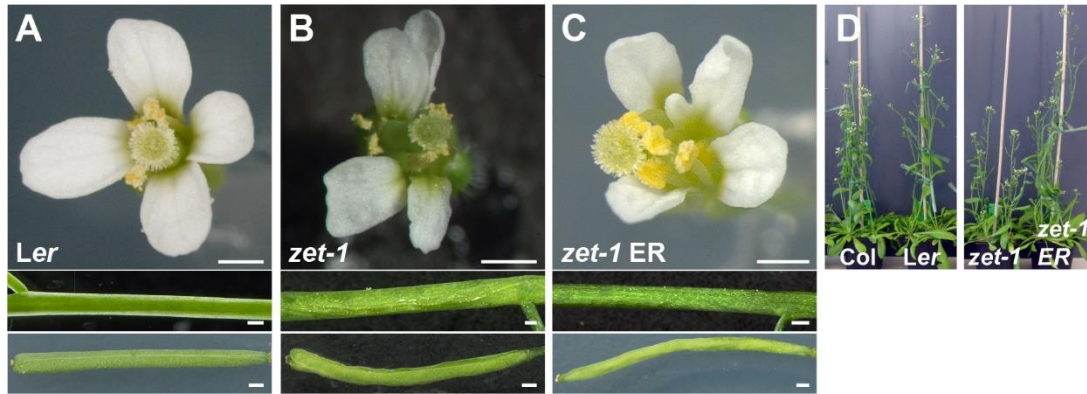

557

558 **Fig. 5. The *zet-1* phenotype in the presence of functional *ERECTA* (*ER*). (A-C)**

559 Comparison of wild type, *zet-1* and *zet-1* plants transgenic for Col *ERECTA* Morphology of

560 flowers (upper panel), stems (central panel) and siliques (bottom panel). (A) Wild-type *Ler*.

561 (B) *zet-1*. Note the aberrant flower and silique morphology. Stem twisting is mild. (C)

562 Transgenic *zet-1 ER*. Note the irregular flower and silique morphology. Stem morphology is

563 essentially normal. (D) Plant height comparisons of six-week-old *zet-1 ER* transgenic plants

564 in comparison to wild type and mutant reference lines. Note the rescue of plant height in *zet-1*

565 *ER* plants. Scale bars: (A-C) 0.5 mm

566

A

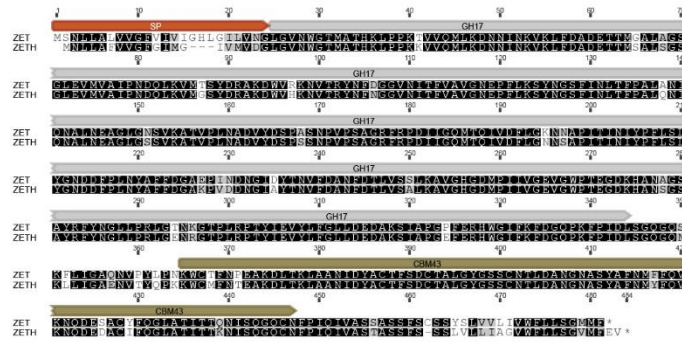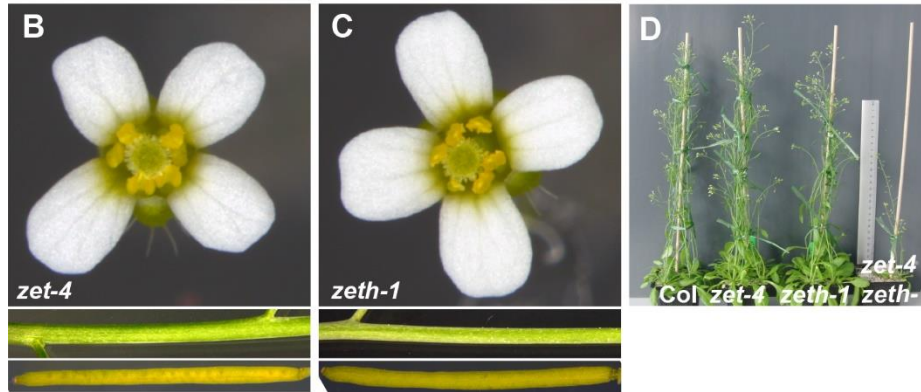

567

568 **Fig. S1.** A) Alignment of ZET and ZETH amino acid sequences. B) *zet-4*. C) *zeth-1*. Flower,  
569 stem and silique morphology is essentially normal. (D) Whole-plant appearance. Genotypes  
570 are indicated.

571



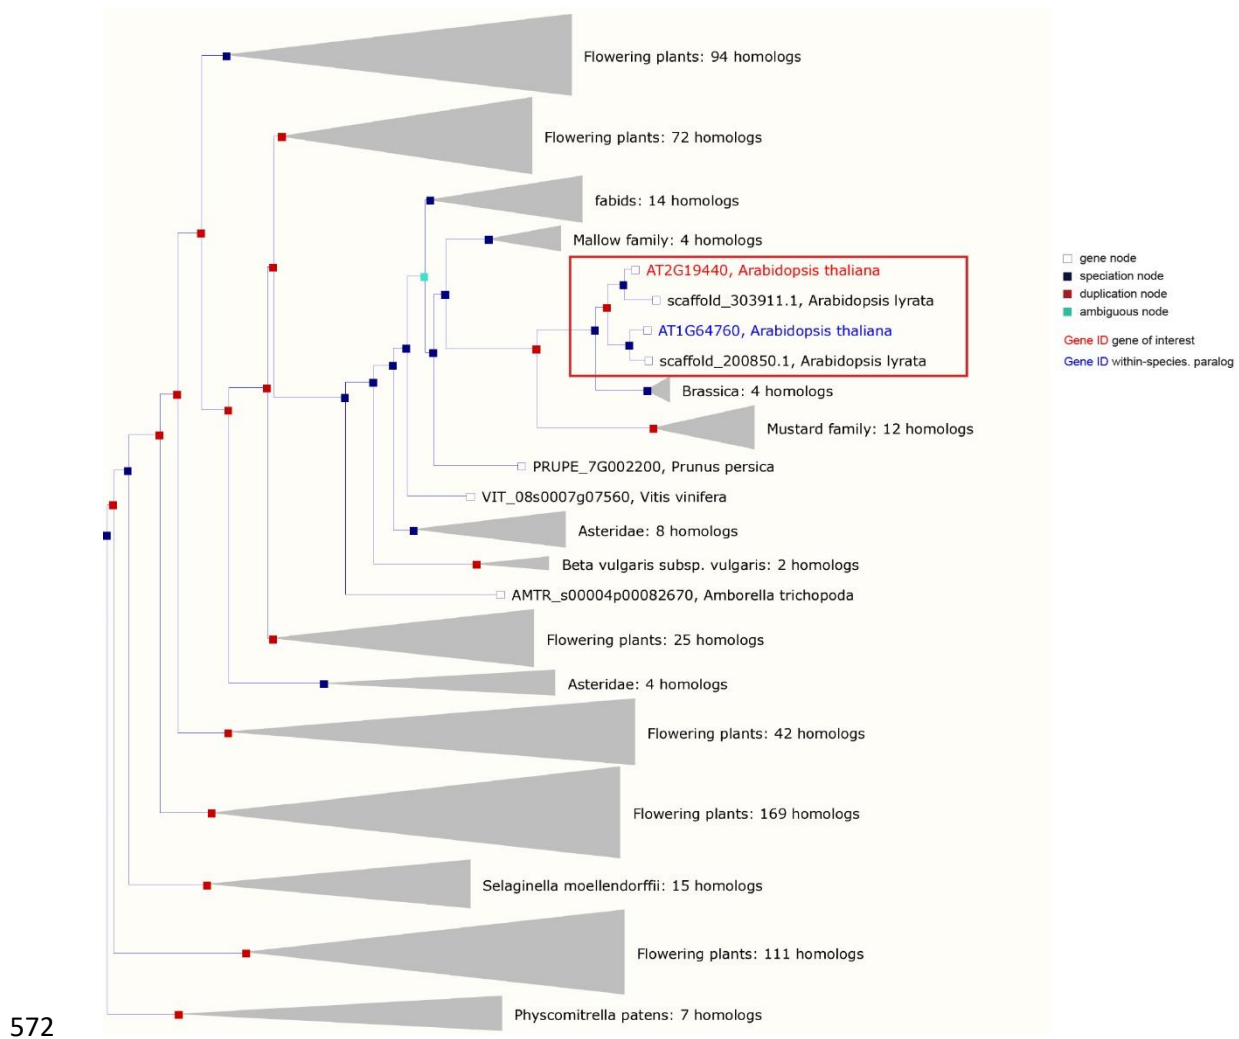

578 **Supplementary Table S1. Primers used in this study.**

| <b>Primer Name</b> | <b>Sequence (5'-3')</b>                     |
|--------------------|---------------------------------------------|
| ZETHCol_F          | ATCCCGGGCTAGGTGTCAACTGGGGAACAATG            |
| ZETHCol_R          | TAGGATCCCATATTATGCAATTTAATACATGG            |
| ZETHLer_F/         | ATCCCGGGCTAGGTGTGAACTGGGGAACAATG            |
| ZETHLer_R          | TAGGATCCATCACGTACATTAAGTCCGTTAG             |
| ZETqRT_F           | TCAAGATGAGAGTGCTTGCTATTTT                   |
| ZETqRT_R           | CACAACCAAAGAATAAGACGAACAAGA                 |
| ZETHqRT_F          | CCAGGATGAGGATGCTTGTATCTTC                   |
| ZETH qRT_R         | TCCTGATAAGAGAAACCAAACCTCCAGC                |
| DT1-F0_ZETH        | TGTAATGATCAGCTTAAGGTTGTTTTAGAGCTAGAAATAGC   |
| DT2-R0_ZETH        | AACAACCTTAAGCTGATCATTACAATCTCTTAGTCGACTCTAC |
| DT1-BsF_ZETH       | ATATATGGTCTCGATTGTAATGATCAGCTTAAGGTTGTT     |
| DT2-BsR_ZETH       | ATTATTGGTCTCGAAACAACCTTAAGCTGATCATTACAA     |

579
